# Supplementary material for: Pt-core silica shell nanostructure: a robust catalyst for the highly corrosive sulfuric acid decomposition reaction in sulfur iodine cycle to produce hydrogen
Source: Royal Society of Chemistry journal article supplement (doi:10.1039/d0nj04830e), 2020-12-08
Supplement: d0nj04830e1.pdf [file d0nj04830e1.pdf]

## Supporting Information

### **Pt core silica shell nanostructure: A robust catalyst for highly corrosive sulfuric acid decomposition reaction in SI cycle to produce hydrogen**

Hassnain Abbas Khan<sup>a,b</sup>, Kwang-Deog Jung<sup>\*a,b</sup>, Tansir Ahamad<sup>c</sup>, and Mohd Ubaidullah<sup>c</sup>, Muhammad Imran<sup>d</sup>, and Saad M. Alshehri<sup>c</sup>

<sup>a</sup>Clean Energy and Chemical Engineering, University of Science and Technology, 217, Gajeong-ro Yuseong-gu, Daejeon, Republic of Korea

<sup>b</sup>Clean Energy Research Centre, Korea Institute of Science and Technology, P.O. Box 131, Cheongryang, Seoul 136-791, Republic of Korea

<sup>c</sup>Department of Chemistry, College of Science, King Saud University, Riyadh 11451, Saudi Arabia

<sup>d</sup>Saudi Basic Industries corporation (SABIC) Technology and Innovation Centre, King Saud University, Riyadh 11451 Saudi Arabia

*\*Corresponding author. Email: : hassnain.khan@kaust.edu.sa (H. A. Khan)*

1. Stability test of Pt/Al<sub>2</sub>O<sub>3</sub> and Pt/TiO<sub>2</sub> catalyst at GHSV: 76000 mL.g<sub>cat</sub><sup>-1</sup>.h<sup>-1</sup> for 100 h.

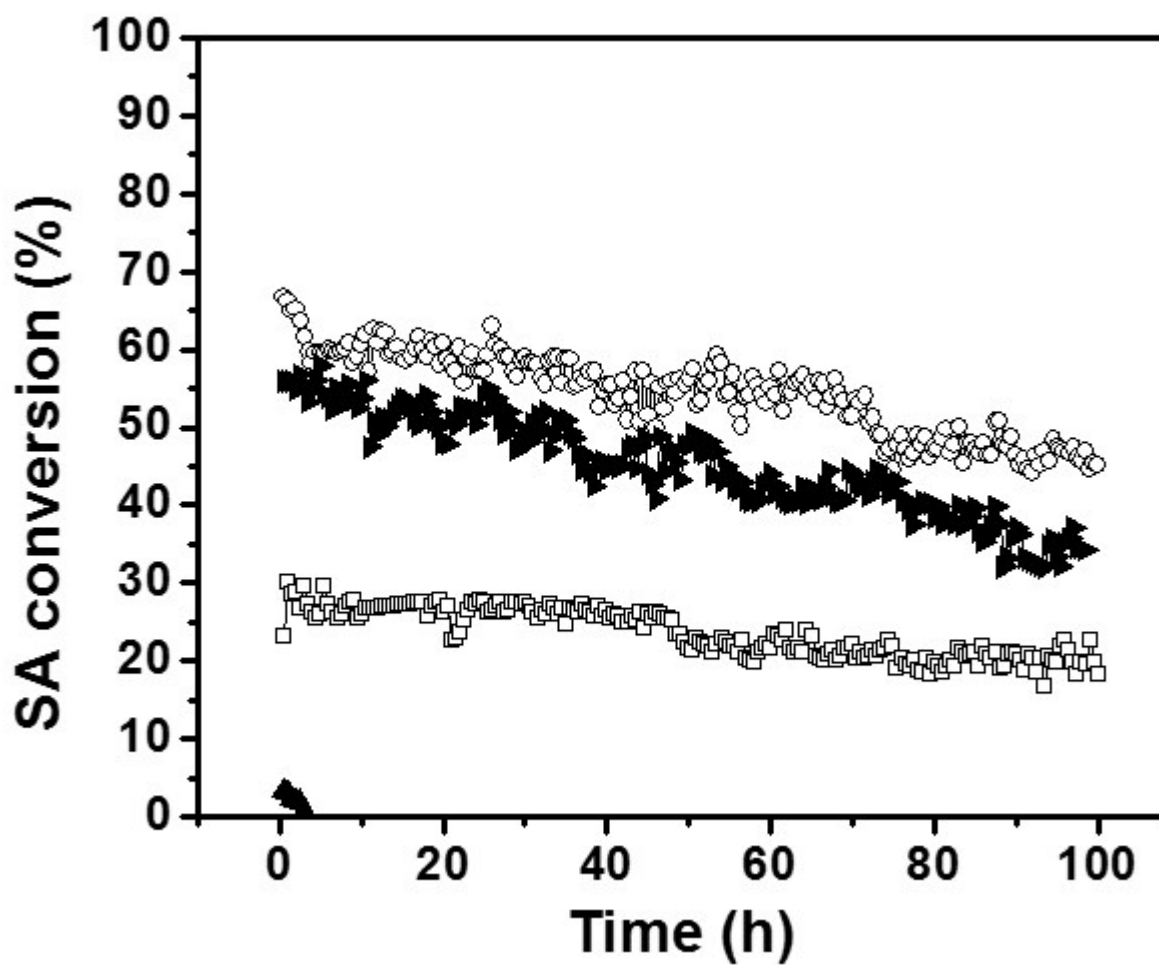

**Figure S1.** Longer-term stability test over : (□) 650 °C (○), 850 °C for Pt/TiO<sub>2</sub> and (▲) 650 and (▶) Pt/Al<sub>2</sub>O<sub>3</sub> at 850 °C. GHSV: 76,000 mL.g<sub>cat</sub><sup>-1</sup>.h<sup>-1</sup>

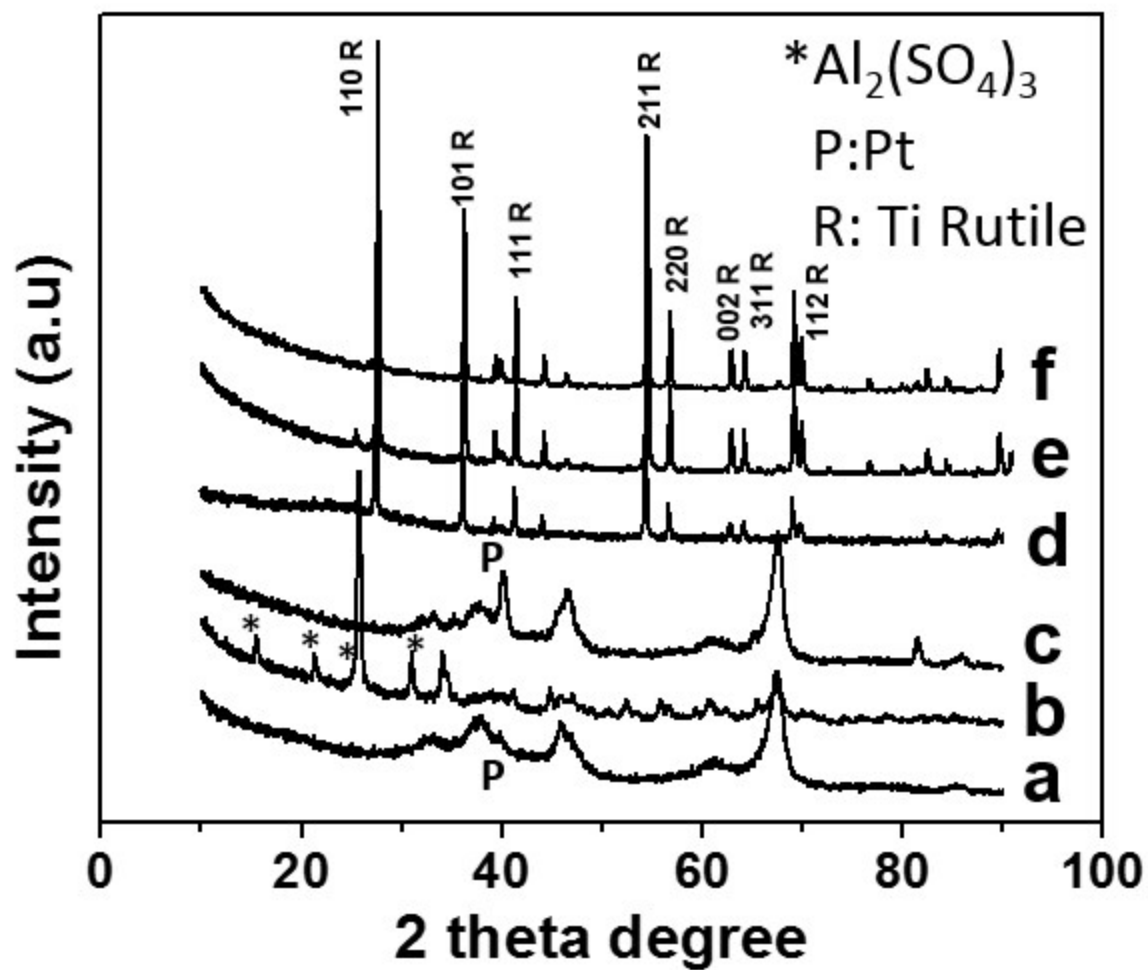

**Figure S2.** XRD analysis of Pt/Al<sub>2</sub>O<sub>3</sub> and Pt/TiO<sub>2</sub> pristine and spent catalyst at 850 and 650 °C for 100 h at 76000 mL.g<sub>cat</sub><sup>-1</sup>.h<sup>-1</sup>
